# Supplementary material for: A Major Quantitative Trait Loci Cluster Controlling Three Components of Yield and Plant Height Identified on Chromosome 4B of Common Wheat
Source: Frontiers journal article supplement (doi:10.3389/fpls.2021.799520), 2022-01-11
Supplement: Data_Sheet_1.ZIP [file Data_Sheet_1.ZIP]

## Sheet: Article information
Article title: Identified and dissected a major QTL cluster controlling three components of yield and plant height near the Rht-B1 locus in common wheat (Triticum aestivum L.)
Journal name: Theoretical and Applied Genetics
Auhtor names: Shaozhe Wen1, Jinghui Li2, Keling Tu3, Minghu Zhang1, Chaofeng Fan4, Shuai Tian1, Chan Bi1, Zelin Chen1, Huanhuan Zhao1, Chaoxiong Wei1, Xintian Shi1, Jiazheng Yu1, Qixin Sun1, Mingshan You1, *
The E-mail address of corresponding author: msyou67@cau.edu.cn.

## Sheet: Table S1
Table S1 Information of the RIL population evaluated environments
Growing season	Location a	Code	Materials
2014-2015	Hebei, Handan	E1	RILs (F2:6)
2014-2015	Beijing, Shangzhuang	E2	RILs (F2:6)
2014-2015	Shanxi, Yangling	E3	RILs (F2:6)
2015-2016	Hebei, Handan	E4	RILs (F2:7)
2015-2016	Beijing, Shangzhuang	E5	RILs (F2:7)
2015-2016	Beijing, Chinese Academy of Agricultural Sciences (CASS)	E6	RILs (F2:7)
2016-2017	Beijing, Shangzhuang	E7	RILs (F2:8)
a Hebei, Handan (36°35′N, 114°50′E), Beijing, Shangzhuang (40°04′N, 116°12′E), Shanxi, Yangling (34°16′N, 108°05′E), Beijing, CAAS (39°58′N, 116°19′E).

## Sheet: Table S2
Table S2 Parental and population means and ranges of spike number per unit area (SN), grain number per spike (GNS), thousand grain weight (TGW) and plant height (PH)
Traits	Env. a	parental lines			RIL population
		ND981	ND3097		Max.	Min.	Mean	SD b	CV(%) c	Shapiro-Wilk test (P value)
SN	E1	1615.0±49.0	900.0±29.5		1735	475	980	299.5	30.56	2.607e-05
	E2	955.0±66.5	460.0±52.5		1205	340	690	195	28.26	0.0004656
	E3	860.0±78.0	600.0±134.5		1200	290	600	166.5	27.75	4.635e-06
	E4	1235.0±175.0	810.0±127.5		1710	430	805	226	28.07	3.267e-05
	E5	905.0±50.0	510.0±55.5		1320	445	785	194	24.71	2.091e-05
	E6	975.0±45.0	835.0±35.0		1600	365	935	231	24.71	0.005043
	E7	1075.0±106.0	680.0±21.5		1245	360	710	192	27.04	1.488e-05
	BLUP	1088	685							7.012e-07
GNS	E1	34.0±0.7	46.2±2.3		55.6	24.4	38.3	5.6	14.76	0.5051
	E2	35.0±1.6	48.2±4.5		55.4	28.9	40.6	5.3	13.03	0.1183
	E3	38.3±2.8	50.5±0.6		59.3	24.7	41	6.7	16.38	0.4987
	E4	30.3±2.1	47.1±0.7		48.5	21.3	34.7	5.1	14.74	0.2272
	E5	30.5±4.4	46.3±2.5		52.1	21.3	33.9	5.7	16.71	0.4291
	E6	33.1±3.3	46.6±1.3		49.3	22.5	34.4	6.3	18.37	0.009182
	E7	34.7±2.8	43.5±1.2		45.7	14.5	28.1	5.8	20.64	0.2528
	BLUP	33.7	46.9143							0.04035
TGW	E1	44.86±1.22	45.72±1.44		54.78	31.64	45.58	3.85	8.44	0.00252
	E2	35.50±0.71	48.06±3.72		53.51	31.09	42.64	4.69	11	0.004787
	E3	40.38±4.04	48.44±0.06		55.28	33.89	43.81	3.43	7.83	0.9045
	E4	44.96±0.51	52.52±0.51		59.94	36.77	47.94	3.94	8.23	0.405
	E5	31.45±1.24	42.35±0.43		53.52	21.74	38.28	6.15	16.06	0.03564
	E6	42.04±3.32	51.92±0.65		57.8	38.13	47.41	4.08	8.6	0.2445
	E7	38.35±1.43	48.84±0.77		53.81	35.94	43.81	3.66	8.35	0.2739
	BLUP	39.6486	48.2643							0.3403
PH	E1	82.6±2.1	91.3±1.0		122	72	93.8	11.2	11.92	0.0002642
	E2	71.3±4.0	79.6±2.5		105	67	83.7	9	10.74	0.009568
	E3	90.0±2.8	92.0±2.8		135	71	96.2	13	13.5	3.435e-06
	E4	75.3±0.6	87.3±1.5		119	58	88.6	10.9	12.26	0.007363
	E5	77.7±2.5	89.1±0.3		119	68	92	11.4	12.38	0.006519
	E6	82.7±2.1	88.6±0.6		122	72	94.1	10.4	11.06	0.06266
	E7	90.2±0.4	96.7±0.5		113	72	89.3	8.6	9.63	0.0308
	BLUP	81.4	89.2286							0.002955
a Env. E1, 2014-2015 Hebei, Handan; E2, 2014-2015 Beijing, Shangzhuang; E3, 2014-2015 Shanxi, Yangling; E4, 2015-2016 Hebei, Handan; E5, 2015-2016 Beijing, Shangzhuang; E6, 2015-2016 Beijing, Chinese Academy of Agricultural Sciences (CASS); E7, 2016-2017 Beijing, Shangzhuang.
b SD is the standard deviation.
c CV is the coefficient of variation.

## Sheet: Table S3
Table S3 Correlation coefficients among spike number per unit area (SN), grain number per spike (GNS), thousand grain weight (TGW) and plant height (PH) in the BLUP values
Traits	SN	TGW	GNS	PH
SN	1.000**
TGW	-0.320**	1.000**
GNS	-0.622**	0.023ns	1.000**
PH	0.418**	0.275**	-0.202**	1.000**
* indicates significance at the 0.05 level; ** indicates significance at the 0.01 level; ns indicates not significant.

## Sheet: Table S4
Table S4 Combined analysis of variance (ANOVA) and broad-sense heritabilities for SN, GNS, TGW and PH across seven environments
Source of variance	DF	SN		GNS		TGW		PH
		SS	P value	SS	P value	SS	P value	SS	P value
Genotypes	205	4509792	0	90881.6	0	38721.9	0	329389	0
Genotypes*Environments	1230	2148415	0	34528	0	25103.1	0	95769.3	0
Environments	6	2.1794e+06	0	67139.1	0	29331.2	0	61535	0
Replicates in environments	14	71429.6	0	1463.42	4.083e-05	373.673	4.888e-06	1665.11	0
Error	2157	889302		22196.3		8153.48		30357.2
Broad-sense heritability (%)		92.51		93.92		90.05		95.35

## Sheet: Table S5
Table S5 The distribution and density of SNP markers on 21 wheat chromosomes
Chromosomes	Total markers	Unique locus	Length(cM)	cM/locus a
1A	511	153	305.58	1.99725
1B	1351	70	252.06	3.60086
1D	65	23	98.39	4.27783
2A	386	95	225.63	2.37505
2B	725	148	328.44	2.21919
2D‡	157	46	99.79	2.16935
3A	119	98	266.37	2.71806
3B	616	147	273.74	1.86218
3D‡	38	19	160.4	8.44211
4A	317	93	252.59	2.71602
4B‡	342	132	300.32	2.27515
4D	33	14	100.55	7.18214
5A‡	501	96	324.51	3.38031
5B	996	179	351.74	1.96503
5D‡	26	8	66.23	8.27875
6A	219	83	219.53	2.64494
6B	325	70	245.95	3.51357
6D‡	119	37	161.34	4.36054
7A	245	114	305.79	2.68237
7B	265	97	259.93	2.67969
7D	37	10	108.14	10.814
A genome	2298	732	1900.37	2.59613
B genome	4620	843	2012.18	2.38693
D genome	475	157	794.84	5.06268
Total	7393	1732	4707.39	2.71789
‡Chromosomes with two separated linkage groups.
a cM/locus was caculated by dividing their summed genetic length by their added number of unique loci.

## Sheet: Table S6
Table S6 Stable QTL controlling spike number per unit area (SN), grain number per spike (GNS), thousand grain weight (TGW) and plant height (PH) in the ND981/ND3097 RIL population
Trait	Chromosome	QTL	Environment	Position(cM)	Nearest marker	LOD	PVE(%）	Additive effect	Confidence interval (LOD±2)	Positive allele
SN	4B-1	QSn.cau-4B-1.1	E1	150	RAC875_c27536_611	34.835	50.5919	236.026	147.5-151.5	ND981
			E2	151	RAC875_c27536_611	36.277	53.0283	141.502	149.5-152.5	ND981
			E3	151	RAC875_c27536_611	21.5477	36.5976	104.183	149.5-152.5	ND981
			E4	151	RAC875_c27536_611	36.0943	52.0524	172.062	149.5-151.5	ND981
			E5	150	RAC875_c27536_611	41.4602	57.6123	155.324	148.5-151.5	ND981
			E6	152	RAC875_c27536_611	42.3491	30.9746	169.643	150.5-152.5	ND981
			E7	151	RAC875_c27536_611	39.735	59.0048	150.929	149.5-152.5	ND981
			BLUP	151	RAC875_c27536_611	61.243	51.1421	144	149.5-151.5	ND981
GNS	2A	QGns.cau-2A.2	E1	145	tplb0046b02_872	3.1952	3.8031	-1.101	142.5-147.5	ND3097
			E5	142	RAC875_rep_c69619_145	4.1953	3.9493	-1.1069	141.5-144.5	ND3097
			E6	145	tplb0046b02_872	4.0103	4.182	-1.3255	142.5-146.5	ND3097
			E7*	134.0*	wsnp_Ra_c3378_6318431	3.101	2.9705	-1.0053	125.5-141.5	ND3097
			BLUP	145	tplb0046b02_872	8.0915	5.8288	-1.1954	142.5-145.5	ND3097
	3B	QGns.cau-3B.1	E1	72	BS00063858_51	4.3118	5.1747	-1.2751	68.5-81.5	ND3097
			E3	91	BobWhite_c10402_170	5.7653	7.4234	-1.9347	86.5-97.5	ND3097
			E5	81	BobWhite_c10402_170	3.4948	3.9889	-1.1142	72.5-85.5	ND3097
			E6	90	BobWhite_c10402_170	4.1966	5.5626	-1.5187	78.5-97.5	ND3097
			E7	86	BobWhite_c10402_170	3.4715	2.9229	-1.0049	76.5-92.5	ND3097
			BLUP	86	BobWhite_c10402_170	6.8231	4.8957	-1.0962	79.5-93.5	ND3097
	4A	QGns.cau-4A	E1	151	RAC875_c37810_241	6.5925	8.4955	1.633	150.5-151.5	ND981
			E2	151	RAC875_c37810_241	5.9977	7.2915	1.4577	150.5-151.5	ND981
			E3	151	RAC875_c37810_241	3.6741	3.7821	1.3802	150.5-151.5	ND981
			E4*	149.0*	wsnp_Ex_c3988_7221220	6.634	9.9253	1.578	145.5-149.5	ND981
			E5	151	RAC875_c37810_241	7.3668	7.7609	1.5468	150.5-151.5	ND981
			E6	151	RAC875_c37810_241	5.7146	6.2081	1.6023	150.5-151.5	ND981
			E7*	150.0*	IAAV5722	7.6163	6.5921	1.4971	149.5-150.5	ND981
			BLUP	151	RAC875_c37810_241	12.2596	9.6953	1.5299	150.5-151.5	ND981
	4B-1	QGns.cau-4B-1	E1*	150.0*	RAC875_c27536_611	15.3715	23.574	-2.7217	147.5-151.5	ND3097
			E2	154	BS00100838_51	20.7141	29.9808	-2.9559	152.5-156.5	ND3097
			E3	154	BS00100838_51	25.0242	34.8462	-4.1901	152.5-156.5	ND3097
			E4	153	BS00100838_51	12.8062	20.2408	-2.2506	152.5-155.5	ND3097
			E5	155	BS00100838_51	26.343	36.0927	-3.3365	152.5-157.5	ND3097
			E6	154	BS00100838_51	25.29	35.7995	-3.8484	152.5-156.5	ND3097
			E7*	152.0*	RAC875_c27536_611	39.6395	50.4304	-4.1409	150.5-152.5	ND3097
			BLUP	154	BS00100838_51	41.5595	46.8035	-3.3613	152.5-156.5	ND3097
TGW	1A	QTgw.cau-1A.3	E1	280	RAC875_c11363_764	3.2389	5.6897	-1.0163	277.5-281.5	ND3097
			E3	279	RAC875_c11363_764	3.2883	6.5792	-0.9071	277.5-281.5	ND3097
			E7	280	RAC875_c11363_764	2.6769	4.5753	-0.7806	277.5-281.5	ND3097
			BLUP	277	Jagger_c6772_80	4.3468	6.0286	-0.91	271.5-278.5	ND3097
	4B-1	QTgw.cau-4B-1.1	E2	151	RAC875_c27536_611	3.5322	3.9155	-1.1366	145.5-152.5	ND3097
			E4	161	BS00100838_51	4.2609	7.3955	-1.1981	153.5-168.5	ND3097
			E6*	157.0*	BS00100838_51	11.9018	18.7512	-1.9595	152.5-161.5	ND3097
			E7	152	RAC875_c27536_611	8.8037	15.1816	-1.4144	151.5-152.5	ND3097
			BLUP	151	RAC875_c27536_611	5.2523	7.2896	-1	146.5-152.5	ND3097
PH	4A	QPh.cau-4A.2	E2	144	Excalibur_c11968_204	3.0963	2.7305	1.6562	139.5-147.5	ND981
			E4	144	Excalibur_c11968_204	5.6351	4.259	2.6604	140.5-147.5	ND981
			E5	144	Excalibur_c11968_204	3.5243	2.7402	2.2134	140.5-148.5	ND981
			E6	145	Excalibur_c11968_204	2.9755	2.9591	1.6648	137.5-149.5	ND981
			E7	144	Excalibur_c11968_204	3.5511	3.0996	1.9623	138.5-149.5	ND981
			BLUP	144	Excalibur_c11968_204	3.8446	3.2472	1.867	140.5-148.5	ND981
	4B-1	QPh.cau-4B-1.1	E1	128	Tdurum_contig31514_449	6.5496	5.3963	2.8797	126.5-129.5	ND981
			E3	128	Tdurum_contig31514_449	5.5105	5.7786	3.0802	126.5-129.5	ND981
			E2*	131.0*	Kukri_rep_c74376_188	4.1988	3.7774	1.9486	129.5-133.5	ND981
			E6	132	Kukri_rep_c74376_188	5.9133	5.354	2.5753	129.5-133.5	ND981
			BLUP	131	Kukri_rep_c74376_188	5.028	4.3304	2.1573	129.5-133.5	ND981
	4B-1	QPh.cau-4B-1.2	E1	155	BS00100838_51	15.9294	17.1644	5.1168	153.5-158.5	ND981
			E3	154	BS00100838_51	21.0099	27.998	6.7492	152.5-156.5	ND981
			E4	155	BS00100838_51	21.8345	21.7914	6.0008	153.5-157.5	ND981
			E5	154	BS00100838_51	17.8477	17.5833	5.5868	152.5-157.5	ND981
			E7	153	BS00100838_51	12.2378	12.4594	3.4044	152.5-157.5	ND981
			BLUP	155	BS00100838_51	10.6357	11.4555	3.4952	152.5-158.5	ND981
	4D	QPh.cau-4D	E1	6	RAC875_c6922_291	23.9293	31.0138	-7.1057	3.5-9.5	ND3097
			E2	7	RAC875_c6922_291	27.7375	39.1466	-6.4703	4.5-9.5	ND3097
			E3	5	RAC875_c6922_291	12.1171	18.5344	-5.6588	0.0-8.5	ND3097
			E4	8	RAC875_c6922_291	20.6674	25.7582	-6.7454	4.5-10.5	ND3097
			E5	8	RAC875_c6922_291	22.8203	29.5179	-7.5081	5.5-11.5	ND3097
			E6	7	RAC875_c6922_291	26.0092	36.7589	-6.9842	3.5-9.5	ND3097
			E7	7	RAC875_c6922_291	21.3199	32.0075	-5.6574	4.5-10.5	ND3097
			BLUP	7	RAC875_c6922_291	27.2457	36.8923	-6.5291	4.5-10.5	ND3097
Notes: * indicates that the confidence interval of the QTL detected in this environment does not coincide with the confidence interval of the QTL detected in other environments, but one boundary overlaps, so it is considered to be the same QTL.

## Sheet: Table S7
Table S7 Putative QTL controlling spike number per unit area (SN), grain number per spike (GNS), thousand grain weight (TGW) and plant height (PH) in the ND981/ND3097 RIL population
Trait	Chromosome	QTL	Environment	Position(cM)	LeftMarker	LOD	PVE(%）	Additive effect	Confidence interval (LOD±2）	Positive allele
SN	1B	QSn.cau-1B	E4	37	JD_c10376_670	3.6719	3.7935	-37.2	35.5-41.5	ND3097
	2D-1	QSn.cau-2D-1	E6	55	IAAV6312	5.5297	2.5784	39.1	53.5-56.5	ND981
	4B-1	QSn.cau-4B-1.2	E6	226	wsnp_Ex_c26285_35531493	43.73	32.1745	173.513	225.5-226.5	ND981
	5B	QSn.cau-5B.1	BLUP	300	Kukri_c35405_256	35.8777	22.3402	95	299.5-300.5	ND981
	5B	QSn.cau-5B.2	E3	324	Kukri_c59657_805	2.5182	3.4012	31.7535	322.5-324.5	ND981
	6A	QSn.cau-6A	E2	210	Kukri_rep_c103186_134	2.5936	2.514	30.838	209.5-215.5	ND981
	6B	QSn.cau-6B	E2	224	Excalibur_rep_c69865_106	3.5593	3.6293	-37.2255	223.5-230.5	ND3097
			BLUP	224	Excalibur_rep_c69865_106	3.3381	1.482	-25	215.5-231.5	ND3097
	6D-2	QSn.cau-6D-2	E5	41	RAC875_c8283_183	2.759	2.4004	31.7205	28.5-41.5	ND981
GNS	1A	QGns.cau-1A	BLUP	149	Tdurum_contig50499_858	3.3572	2.332	-0.8	145.5-152.5	ND3097
	1D	QGns.cau-1D.1	E3	73	BS00079462_51	2.7863	2.8007	1.1949	71.5-73.5	ND981
	1D	QGns.cau-1D.2	E1	81	BobWhite_c28341_51	2.7284	3.3127	1.02	79.5-83.5	ND981
	2A	QGns.cau-2A.1	E2	76	Tdurum_contig44687_464	5.0885	7.5705	-1.4978	69.5-82.5	ND3097
	2B	QGns.cau-2B	E2	88	wsnp_Ex_c21092_30220702	2.5658	2.8384	-0.9124	86.5-91.5	ND3097
	3B	QGns.cau-3B.2	E4	135	BS00052423_51	3.3221	4.9512	-1.1134	133.5-136.5	ND3097
	3B	QGns.cau-3B.3	E3	273	Excalibur_c23620_560	5.0161	5.052	1.6	272.5-274.0	ND981
	4D	QGns.cau-4D	E5	4	RAC875_c6922_291	6.6538	8.2914	-1.6416	0-10.5	ND3097
	6D-2	QGns.cau-6D-2.1	E4	46	RAC875_c25839_225	4.7908	7.3102	-1.3528	43.5-49.5	ND3097
			E5	48	RAC875_c25839_225	2.8706	2.7341	-0.9186	43.5-49.5	ND3097
			E6*	43.0*	wsnp_Ex_c23383_32628864	2.6408	2.7298	-1.0626	41.5-43.5	ND3097
	6D-2	QGns.cau-6D-2.2	E2	73	BobWhite_c14066_403	3.5746	4.0823	-1.0916	72.5-75.5	ND3097
	7A	QGns.cau-7A	E7	228	wsnp_Ku_c19943_29512612	2.9854	2.484	0.9257	227.5-236.5	ND981
	7D	QGns.cau-7D	E1	89	BS00035732_51	3.1555	3.7832	-1.0971	85.5-93.5	ND3097
TGW	1A	QTgw.cau-1A.1	E3	10	RAC875_c38756_141	2.9226	5.6544	-0.8377	9.5-10.5	ND3097
	1A	QTgw.cau-1A.2	E6	231	BS00067119_51	4.538	5.6036	-1.0705	230.5-233.5	ND3097
	1A	QTgw.cau-1A.4	E5	289	wsnp_JD_c6664_7807201	2.6744	1.1284	-1.0955	287.5-289.5	ND3097
	2A	QTgw.cau-2A	E5	76	Tdurum_contig44687_464	3.2351	1.7785	1.3731	69.5-85.5	ND981
	3A	QTgw.cau-3A	E7	157	Kukri_c63259_151	3.1791	5.1696	-0.8274	153.5-162.5	ND3097
	3B	QTgw.cau-3B.1	E6	6	Tdurum_contig17943_547	2.6321	3.3275	0.8256	5.5-7.5	ND981
	3B	QTgw.cau-3B.2	BLUP	14	Kukri_rep_c75764_261	3.0995	4.4566	0.78	11.5-20.5	ND981
	3D-1	QTgw.cau-3D-1	E4	51	Kukri_c8913_655	2.5518	3.4726	0.8276	45.5-55.5	ND981
	4A	QTgw.cau-4A.1	BLUP	119	RAC875_c49370_327	2.7308	3.6207	-0.71	118.5-119.5	ND3097
	4A	QTgw.cau-4A.2	E2	180	IAAV1383	3.2398	4.2272	-1.1818	173.5-185.5	ND3097
	4B-1	QTgw.cau-4B-1.2	E5	204	wsnp_Ex_c22078_31257869	22.5335	12.15	-3.5669	203.5-204.5	ND3097
	4B-1	QTgw.cau-4B-1.3	E5	210	D_contig71558_575	30.8915	18.354	4.3873	209.5-210.5	ND981
	4D	QTgw.cau-4D	E2	7	RAC875_c6922_291	16.2498	27.0922	-3.0875	3.5-10.5	ND3097
			E5	9	RAC875_c6922_291	21.7087	16.2187	-4.2788	5.5-11.5	ND3097
			BLUP	8	RAC875_c6922_291	5.7293	12.9831	-1.3718	2.5-12.5	ND3097
	5A-2	QTgw.cau-5A-2.1	E7	44	wsnp_RFL_Contig2265_1693968	3.9991	6.9182	-0.9628	41.5-48.5	ND3097
	5A-2	QTgw.cau-5A-2.2	E6	68	RAC875_rep_c112818_307	4.1957	5.158	-1.0275	65.5-69.5	ND3097
	6B	QTgw.cau-6B	E4	169	GENE-4093_178	3.4079	5.9146	-1.0714	159.5-172.5	ND3097
	6D-1	QTgw.cau-6D-1	E1	11	D_contig13913_154	3.1641	7.6742	1.174	1.5-20.5	ND981
			E4	11	D_contig13913_154	3.5826	7.205	1.1814	2.5-17.5	ND981
	6D-2	QTgw.cau-6D-2	E4	43	wsnp_Ex_c23383_32628864	3.0722	4.2218	0.904	42.5-45.5	ND981
			BLUP	43	wsnp_Ex_c23383_32628864	3.3844	4.4129	0.7774	42.5-45.5	ND981
	7A	QTgw.cau-7A	E6	284	CAP8_c8600_222	3.4141	4.2631	0.9357	283.5-288.5	ND981
PH	2D-1	QPh.cau-2D-1	E3	47	BobWhite_c16655_421	2.5702	2.625	-2.0661	45.5-47.5	ND3097
	3D-1	QPh.cau-3D-1	E3	45	Kukri_c8913_655	2.543	2.9812	2.2083	30.5-53.5	ND981
			E4	51	Kukri_c8913_655	3.8476	2.7905	2.1653	46.5-53.5	ND981
	4A	QPh.cau-4A.1	E4	44	wsnp_Ex_c5690_9994305	2.7658	2.2561	1.9357	33.5-54.5	ND981
	4B-1	QPh.cau-4B-1.3	E2	151	RAC875_c27536_611	5.4528	5.2675	2.2932	147.5-152.5	ND981
			E6	151	RAC875_c27536_611	6.4192	6.2103	2.7687	147.5-152.5	ND981
	5A-1	QPh.cau-5A-1	E1	72	wsnp_Ex_c11309_18272248	3.7396	3.0306	2.1499	69.5-74.5	ND981
			E6	72	wsnp_Ex_c11309_18272248	3.5123	3.0964	1.9561	69.5-76.5	ND981
			BLUP	72	wsnp_Ex_c11309_18272248	2.5212	2.1159	1.5032	69.5-76.5	ND981
	5A-2	QPh.cau-5A-2	E6	161	BobWhite_c11539_336	3.5049	3.7935	2.166	148.5-170.5	ND981
	6A	QPh.cau-6A	E1	24	Kukri_rep_c102263_1262	3.5956	2.8483	-2.0855	22.5-28.5	ND3097
			E3	24	Kukri_rep_c102263_1262	2.989	3.0202	-2.2198	22.5-27.5	ND3097
	6B	QPh.cau-6B	E7	212	Kukri_c42612_81	2.7565	2.5297	-1.555	206.5-216.5	ND3097
	6D-2	QPh.cau-6D-2	E5	43	wsnp_Ex_c23383_32628864	3.5463	2.741	2.2054	42.5-44.5	ND981
	7D	QPh.cau-7D	E5	39	RAC875_c4453_2678	2.8088	2.2418	-2.0021	36.5-50.5	ND3097
Notes: * indicates that the confidence interval of the QTL detected in this environment does not coincide with the confidence interval of the QTL detected in other environments, but one boundary overlaps, so it is considered to be the same QTL.

## Sheet: Table S8
Table S8 Sequences of developed InDel markers used for saturating linkage map and screening recombinants
Marker name	left primer	right primer
INDEL(4B)20-1	ACCTGAGGACAATGCACACT	TCCTGAAAATCATCGTGCGC
INDEL(4B)27-1	CACATTGCAGTATCCCACCG	ACTCCAAGTGTCCGACAACA
INDEL(4B)29-1	ACTCACCATTACAACCAGCC	TAATTCGGGGCGGAGAGTAC
INDEL(4B)30-1	GGGACCTTTCTGAGTTGGGA	GTCGGATCCCAGATGCAGAG
INDEL(4B)31-1	AGCCAATTAACAACAGCCGT	AAGCATGCACCTAAAACCGG
INDEL(4B)31-2	ACGTAGGTGATGTGGTGTGA	GGTAGCACTCCACTTCCTGA
INDEL(4B)32-16	GCCAGGCATGCATATAGTCG	TTCAGACCGTCCAATCCGAA
INDEL(4B)38-23	CGACGCTATGCTTCACAGTT	GCGGCTTTGTTAATTTGGACG

## Sheet: Table S9
Table S9 The new resultant genetic map of chromosome 4B-1 constructed by new InDel markers and previous SNP markers and corresponding physical position in Chinese Spring RefSeq v1.0 sequences
Marker name	Genetic position (cM)	Physical position (bp) a
wsnp_JD_c14411_14148961	0	NA
BS00094562_51	0.25	NA
BS00045568_51	2.02	291,855,009-291,855,069
BS00023173_51	2.27	NA
GENE-0129_214	5.68	NA
GENE-0208_688	6.67	633,148,529-633,148,602
BS00071893_51	7.42	NA
GENE-0208_279	7.67	NA
Excalibur_c22205_573	8.41	NA
BS00015519_51	8.9	NA
Tdurum_contig10475_87	11.74	357,931,913-357,932,005
Tdurum_contig25612_195	11.98	NA
BS00078414_51	14.84	NA
RFL_Contig5022_2001	15.08	NA
RAC875_c4047_115	17.11	NA
Kukri_c30490_328	17.6	NA
Kukri_c1565_111	18.35	NA
Tdurum_contig42083_890	60.91	4,851,856-4,851,957
Tdurum_contig81460_347	65.87	639,802-639,902
BS00056495_51	66.12	622,405-622,505
wsnp_Ku_c12399_20037334	67.11	1,255,552-1,255,674
RAC875_c86104_111	67.62	1,046,991-1,047,091
BS00056493_51	70	622,300-622,400
IAAV1120	71.54	3,860,137-3,860,315
Tdurum_contig47429_501	72.04	1,771,306-1,771,375
BS00040127_51	73.86	1,777,994-1,778,095
IAAV7221	74.11	2,036,611-2,036,740
RAC875_c29075_225	74.62	3,733,379-3,733,479
RAC875_c32657_295	75.19	NA
BobWhite_c24745_419	76.35	6,011,678-6,011,778
Excalibur_c14401_743	78.42	6,149,813-6,149,913
BobWhite_c19919_301	81.14	6,011,468-6,011,563
BS00039936_51	84.74	5,468,442-5,468,542
RAC875_c94519_419	85.74	4,850,047-4,850,146
BS00106142_51	88.09	4,537,210-4,537,310
Tdurum_contig49608_1185	88.86	7,043,723-7043823
Excalibur_c64208_101	92.03	7,037,841-7,037,941
Kukri_rep_c112779_183	95.52	4,521,931-4,522,016
RAC875_c24098_141	101.98	305,528,439-305,528,503
wsnp_Ex_c13357_21054802	103.5	11,347,167-11,347,367
Excalibur_c64418_447	105.82	11,911,982-11,912,082
GENE-2384_84	107.84	12,528,899-12,528,999
Excalibur_c18318_701	108.09	12,528,824-12,528,914
Excalibur_c18318_665	109.85	12,528,788-12,528,888
Excalibur_c61749_474	110.58	619,975,920-619,976,020
Tdurum_contig50625_2342	112.35	14,118,086-14,118,186
BS00009480_51	114.12	14,118,254-14,118,328
BS00009426_51	116.41	14,119,633-141,19,711
Tdurum_contig31139_143	117.65	13,976,476-13,976,576
BobWhite_c162_145	119.15	13,977,116-13,977,211
BS00037094_51	119.91	12,893,599-12,8936,99
Tdurum_contig93710_409	120.16	12,888,652-12,888,752
Tdurum_contig31139_79	120.67	13,976,540-13,976,640
Kukri_c10445_225	121.41	NA
Excalibur_c7581_791	121.9	14,112,427-14,112,527
Excalibur_c7581_1266	122.15	14,110,484-14,110,584
Kukri_c49506_396	124.51	17,044,001-17,0441,01
Kukri_c8594_203	126.03	17,255,200-17,255,300
tplb0035d20_506	126.28	17,254,323-17,254,393
IAAV2271	126.53	17,469,996-17,470,178
Tdurum_contig31514_449	127.8	19,751,130-19,751,230
wsnp_Ku_c8075_13785546	129.6	20,746,025-20,746,225
Kukri_rep_c74376_188	131.64	19,742,791-19,742,868
RFL_Contig2226_629	133.94	19,755,347-19,755,447
Kukri_rep_c69273_148	137.61	21,555,083-21,555,169
wsnp_Ku_c6242_10965132	138.11	22,901,813-22,901,971
Excalibur_c60791_1196	139.88	23,011,435-23,011,530
Ku_c63300_1309	140.39	21,556,672-21,556,772
BS00061358_51	141.16	NA
BS00100838_51	151.91	28,7165,35-28,716,635
INDEL(4B)29-1	152.74	29,271,835-29,271,855
INDEL(4B)30-1	152.74	30,361,307-30,361,327
INDEL(4B)31-1	152.74	31,706,627-31,706,647
GENE-3024_71	153.52	31,707,922-31,708,022
INDEL(4B)31-2	153.52	31,844,967-31,844,987
RAC875_c27536_611	153.52	32,250,820-32,250,720
Ex_c22263_454	169.11	376,425,769-376,425,869
RAC875_c48283_1574	170.64	159,631,177-159,631,277
Kukri_c11415_1074	182.37	520,214,459-520,214,558
Kukri_c38436_280	185.51	520,212,805-520,212,896
Tdurum_contig45550_570	187.57	538,270,187-53,827,0287
Excalibur_c17206_329	188.06	573,275,478-573,275,578
Tdurum_contig42107_2295	191.47	575,620,710-575,620,810
wsnp_Ex_c35910_43971560	196.9	578,040,234-578,040,434
wsnp_Ku_c27456_37405832	197.39	566,597,536-566,597,692
wsnp_Ex_c17420_26123728	200.24	566,597,794-566,597,988
wsnp_Ra_c3790_6990678	203.37	566,597,469-566,597,663
Tdurum_contig10595_633	203.62	567,176,317-567,176,417
Ku_c5611_1705	205.13	558,546,949-558,547,049
Tdurum_contig55374_309	205.62	536,919,222-536,919,322
wsnp_Ex_c22078_31257869	206.37	573,294,623-573,294,803
Ra_c86142_349	209.58	595,279,088-595,279,188
RAC875_c18200_929	212.24	596,344,013-596,344,113
D_contig71558_575	213	595,708,970-595,709,165
BS00109813_51	214.8	603,144,665-603,144,765
Jagger_c6334_114	215.34	609,474,439-609,474,539
Tdurum_contig10137_89	216.42	612,327,339-612,327,439
BS00042105_51	216.92	616,274,476-616,274,576
wsnp_Ex_c32127_40841791	217.67	615,556,722-615,556,922
wsnp_Ex_c26807_36031771	219.19	616,999,134-616,999,334
RAC875_c67417_275	219.95	621,985,686-621,985,783
CAP12_c2983_140	220.46	618,159,603-618,159,703
IACX11246	221.22	619,079,417-619,079,529
RAC875_c66141_332	222.22	625,336,369-625,336,469
Kukri_c4221_1114	223.23	630,469,929-630,470,027
Ra_c5508_706	224.24	636,789,360-636,789,460
wsnp_Ku_c12503_20174234	225.51	637,394,056-637,394,256
wsnp_Ex_c26285_35531535	225.76	638,116,062-638,116,262
tplb0027f12_503	226.26	638,588,900-638,589,000
BS00012006_51	227.52	638,116,195-638,116,295
wsnp_Ex_c26285_35531493	228.8	638,1160,20-638,116,220
GENE-2566_317	229.3	637,736,921-637,737,017
RFL_Contig5341_816	236.41	645,300,867-645300953
GENE-2826_325	240.38	649,603,894-649,603,976
Kukri_c18722_425	240.63	649,602,880-649602980
RAC875_c87897_333	242.95	650,937,721-650,937,821
Kukri_c93922_206	243.45	653,011,441-653,011,541
RAC875_c37166_408	249.24	654,606,423-654,606,523
Kukri_rep_c101259_159	252.65	657,274,054-657,274,154
IAAV7394	253.15	658,196,565-658,196,765
wsnp_BE403378B_Ta_2_1	253.65	659,155,500-659,155,620
TA001751-0886	254.4	657,990,603-657,990,656
GENE-2278_444	257.6	657,467,145-657,467,239
a Physical position (bp) is acquired by blasting primer sequences of the InDel markers and flanking sequences of the SNP markers into Chinese Spring RefSeq v1.0 sequences. NA represents no best hit on chromosome 4B.

[truncated: 2 more sheets: Table S10, Table S11]
